# Supplementary material
Source: publisher figshare collection journal article supplement (https://rs.figshare.com/ndownloader/files/9393937)
Supplement: Supplementary file 1 [file 9393937]

## Sheet: Sheet1
Species	NCBI	Ensembl	Combined
Anolis carolinensis	19374	18596	21641
Bos taurus	23536	19994	24534
Chrysemys picta	21194	Not Available	21194
Danio rerio	26717	26459	28964
Dasypus novemcinctus	22082	22711	26265
Echinops telfairi	19021	16575	25021
Equus caballus	19733	20449	22458
Felis catus	19615	19493	21481
Gallus gallus	17254	15508	18537
Homo sapiens	20402	22947	21178
Loxodonta africana	20784	20033	22445
Monodelphis domestica	20843	21327	24090
Mus musculus	22554	22619	23983
Oreochromis niloticus	25771	21437	27256
Ornithorhynchus anatinus	21394	21698	26365
Oryctolagus cuniculus	20673	19293	23113
Sarcophilus harrisii	19476	18788	22059
Sorex araneus	20283	13187	23896
Taeniopygia guttata	16496	17488	19556
Xenopus tropicalis	22240	18445	24262
Total	419442	377047	468298
